# Supplementary material for: Cerebrospinal Fluid Inflammatory Cytokine Levels in Patients With Major Psychiatric Disorders: A Multiplex Immunoassay Study
Source: Front Pharmacol. 2021 Feb 1;11:594394. doi: 10.3389/fphar.2020.594394 (PMC7941212; doi:10.3389/fphar.2020.594394)
Supplement: Supplementary file 7 [file table7.xlsx]

## Sheet: tableS7
	Table S7 Comparisons in cerebrospinal fluid cytokine levels between drug free and non-drug free patients with major depressive disorder
		Drug free (n = 26)			Non-drug free (n = 78)			Statistical comparison
		Mean ± Standard deviation			Mean ± Standard deviation
	APRIL/TNFSF13	19746.5	±	5549.42	21430.8	±	7141.41	U = 854, p = 0.23, r = -0.118
	BAFF/TNFSF13B	2784.37	±	466.969	3155.16	±	1063.44	U = 798.5, p = 0.11, r = -0.159
	Soluble CD30/TNFSF8	320.602	±	88.9126	334.81	±	158.137	U = 992, p = 0.87, r = -0.017
	Soluble CD163	3385.1	±	820.097	3510.32	±	1214.04	U = 1004, p = 0.94, r = -0.008
	IFN-α2	4.89559	±	1.8819	5.02725	±	2.63333	U = 964, p = 0.71, r = -0.037
	IFN-β	47.5417	±	6.72638	46.7419	±	8.76658	U = 956.5, p = 0.67, r = -0.043
	Soluble IL-6 receptor α	1047.32	±	280.024	1049.39	±	362.211	U = 961, p = 0.69, r = -0.040
	IL-8	22.0854	±	2.33495	23.8014	±	4.83296	U = 791.5, p = 0.10, r = -0.164
	IL-10	5.7044	±	1.08221	5.48646	±	1.36072	U = 995, p = 0.89, r = -0.014
	IL-11	3.31382	±	1.10416	3.60539	±	1.24169	U = 826, p = 0.16, r = -0.139
	IL-12 (p40)	42.5113	±	9.56259	43.5193	±	10.3458	U = 861, p = 0.25, r = -0.113
	IL-19	19.2646	±	1.95108	19.9107	±	2.7337	U = 870, p = 0.28, r = -0.107
	IL-26	35.7767	±	12.2729	35.1702	±	16.3187	U = 993, p = 0.88, r = -0.016
	IL-29/IFN-λ1	148.199	±	28.2158	157.696	±	44.3685	U = 832.5, p = 0.17, r = -0.134
	Matrix metalloproteinase-3	720.56	±	72.187	737.074	±	94.6754	U = 937, p = 0.56, r = -0.057
	Osteocalcin	92.8975	±	40.7254	95.7206	±	51.8252	U = 1013, p = 0.99, r = -0.001
	Soluble TNF-receptor 1	934.18	±	150.991	1055.81	±	327.337	U = 798, p = 0.11, r = -0.160
	Soluble TNF-receptor 2	331.524	±	138.983	390.5	±	188.381	U = 854.5, p = 0.23, r = -0.118
	TSLP	19.9626	±	5.4793	21.6207	±	7.72742	U = 862, p = 0.25, r = -0.112
	APRIL, A proliferation-inducing ligand; BAFF, B-cell activating factor; CD, cluster of differentiation; IFN, interferon; IL, interleukin; TNF, tumor necrosis factor
	TNFSF, tumor necrosis factor superfamily; TSLP, thymic stromal lymphopoietin
	Values are represented as pg/ml.
